# Supplementary material
Source: publisher figshare collection journal article supplement (https://geolsoc.figshare.com/ndownloader/files/5422688)
Supplement: Supplementary file 1 [file 5422688]

Supplementary table U-Pb SIMS
Sample	NordSim	[Pb]	[U]	Th/U	206Pb	f206Pb *	238U	±?%	207Pb	±?%	%Disc †	206Pb	±?	207Pb	±?
	Spot #				204Pb		206Pb		206Pb			238U		206Pb
		ppm	ppm	calc.	meas.	%					2?-limit	age (Ma)		age (Ma)
MEK: Weakly gneissic K-feldspar megacrystic meta-granite to meta-quartz-monzonite
MEK	n1635-01a	98	327	0.47	81518	0.02	4.098	1.6	0.08929	0.5		1407	20	1410	9
MEK	n1635-02a	39	128	0.58	31819	0.06	4.134	1.6	0.08701	1.0		1397	20	1361	18
MEK	n1635-03a	60	190	0.52	99023	0.02	3.930	1.6	0.08825	0.7	0.9	1461	21	1388	13
MEK	n1635-04a	35	116	0.57	21839	0.09	4.082	1.6	0.08729	1.0		1412	20	1367	19
MEK	n1635-05a	23	64	1.05	15196	0.12	3.762	1.8	0.08898	1.3	1.2	1520	24	1404	25
MEK	n1635-06a	44	135	0.60	15568	0.12	3.805	1.6	0.08776	0.9	4.0	1504	22	1377	18
MEK	n1635-07a	51	169	0.47	84994	0.02	4.075	1.6	0.08772	0.8		1415	20	1376	15
MEK	n1635-08a	48	157	0.58	20986	0.09	4.159	1.6	0.08801	0.9		1389	20	1383	17
IML: High-grade granitic gneiss
IML	n1634-01a	26	68	0.69	27074	0.07	3.432	1.6	0.10161	1.1		1648	23	1654	19.7
IML	n1634-02a	36	94	0.74	15638	0.12	3.487	1.6	0.10125	0.9		1626	23	1674	17.2
IML	n1634-03a	34	76	1.36	18319	0.10	3.286	1.6	0.10264	0.9		1713	25	1672	16.4
IML	n1634-04a	62	154	0.81	27788	0.07	3.326	1.6	0.10340	0.6		1694	24	1686	11.3
IML	n1634-05a	70	189	0.55	50055	0.04	3.393	1.6	0.10222	0.6		1665	23	1665	10.4
IML	n1634-06a	34	86	0.65	16671	0.11	3.304	1.6	0.10297	0.9		1704	24	1678	16.8
IML	n1634-07a	118	300	0.70	53238	0.04	3.306	1.6	0.10326	0.5		1704	24	1684	8.5
IML	n1634-08a	91	225	0.94	100184	0.02	3.407	1.6	0.10365	0.5		1659	24	1691	9.3
IML	n1631-01a	79	192	1.01	19399	0.10	3.415	1.7	0.10218	0.6		1656	25	1664	11
IML	n1631-02a	40	104	0.58	25439	0.07	3.349	1.7	0.10534	0.8		1684	26	1720	15
Hinneryd: High-grade granitic augen gneiss
Hinneryd	n1630-01a	65	171	0.58	19681	0.10	3.366	1.7	0.10292	0.6		1677	25	1678	12
Hinneryd	n1630-02a	24	62	0.69	4394	0.43	3.433	1.8	0.10186	1.2		1648	26	1658	23
Hinneryd	n1630-03a	55	132	1.00	7431	0.25	3.346	1.7	0.10343	0.8		1686	25	1687	15
Hinneryd	n1630-04a	29	73	0.99	4439	0.42	3.540	1.8	0.10143	1.2		1604	25	1651	22
Hinneryd	n1630-05a	132	393	0.53	24497	0.08	3.742	1.7	0.09858	0.5	-1.0	1527	23	1598	9
Hinneryd	n1630-07a	61	161	0.63	17475	0.11	3.396	1.7	0.10375	0.8		1664	25	1692	15
Hinneryd	n1630-08a	39	96	0.91	9910	0.19	3.358	1.7	0.10305	0.9		1680	25	1680	16
Hinneryd	n1641-01a	97	280	0.47	37318	0.05	3.579	1.6	0.09836	0.5		1588	22	1593	9
Hinneryd	n1641-01b	22	52	1.00	8123	0.23	3.242	1.6	0.10269	1.2		1733	25	1673	21
Hinneryd	n1641-02a	48	110	1.06	69013	0.03	3.245	1.7	0.10372	0.7		1732	25	1692	13
Hinneryd	n1641-03a	64	174	0.41	40275	0.05	3.290	1.6	0.10385	0.6		1711	24	1694	10
JAN: High-grade syenitic gneiss
JAN	n1640-01a	27	76	0.73	19743	0.09	3.740	1.6	0.09787	0.9		1527	22	1584	17
JAN	n1640-02a	31	80	0.83	18436	0.10	3.484	1.6	0.09932	0.9		1527	23	1611	16
JAN	n1640-03a	22	53	1.11	11129	0.17	3.441	1.6	0.10057	1.2		1645	24	1635	21
JAN	n1640-04a	30	77	0.60	17923	0.10	3.312	1.6	0.10315	0.9		1701	24	1682	16
JAN	n1640-05a	28	69	0.90	10073	0.19	3.305	1.7	0.10201	1.0		1704	25	1661	18
JAN	n1640-06a	30	79	0.47	30222	0.06	3.304	1.8	0.10258	0.8		1705	27	1671	15
JAN	n1640-07a	48	121	0.68	27024	0.07	3.282	1.6	0.10175	0.7		1714	24	1656	13
JAN	n1640-08a	11	31	0.63	7090	0.26	3.550	2.0	0.09628	1.6		1600	28	1553	29
JAN	n1636-01a	46	106	1.39	13140	0.14	3.447	1.6	0.10031	0.8		1642	23	1630	14
JAN	n1636-02a	35	93	0.84	18503	0.10	3.647	1.6	0.10068	0.8		1562	22	1637	15
Åsafors: Amphibolite facies granitic gneiss
Åsafors	n1642-01a	21	45	1.51	11473	0.16	3.243	1.6	0.10203	1.4		1733	25	1661	26
Åsafors	n1642-02a	30	64	1.48	13720	0.14	3.265	1.7	0.10236	0.9		1722	25	1667	17
Åsafors	n1642-03a	34	67	1.94	18230	0.10	3.250	1.6	0.10334	1.1		1729	24	1685	20
Åsafors	n1642-05a	13	27	1.50	7161	0.26	3.181	1.7	0.10305	1.7		1762	26	1680	31
* % of common 206Pb in measured 206Pb, estimated from 204Pb assuming a present day Stacey and Kramers (1975) model for terrestrial Pb-isotope composition.
† Age discordance at closest approach of error ellipse to concordia (2? level).
